# Supplementary material for: Targeting urine output and 30-day mortality in goal-directed therapy: a systematic review with meta-analysis and meta-regression
Source: PubMed Central journal article supplement (PMC5303289; doi:10.1186/s12871-017-0316-4), 2017-02-10
Supplement: 12871_2017_316_MOESM1_ESM.pdf [file 12871_2017_316_MOESM1_ESM.pdf]

**Table S1** Search strategy in MEDLINE database through PubMed

|     |                                                                                                                                |     |
|-----|--------------------------------------------------------------------------------------------------------------------------------|-----|
| #49 | ((#41 AND #48))                                                                                                                | 446 |
| #48 | ((#44 OR #47))                                                                                                                 |     |
| #47 | ((#45 OR #46))                                                                                                                 |     |
| #46 | "controlled trial"                                                                                                             |     |
| #45 | trial                                                                                                                          |     |
| #44 | ((#42 OR #43))                                                                                                                 |     |
| #43 | "randomised"                                                                                                                   |     |
| #42 | "randomized"                                                                                                                   |     |
| #41 | ((#31 AND #40))                                                                                                                |     |
| #40 | ((#12 AND #39))                                                                                                                |     |
| #39 | ((#32 OR #33 OR #34 OR #35 OR #36 OR #37 OR #38))                                                                              |     |
| #38 | fluid                                                                                                                          |     |
| #37 | "fluid resuscitation"                                                                                                          |     |
| #36 | "fluid loading"                                                                                                                |     |
| #35 | "fluid administration"                                                                                                         |     |
| #34 | "fluid management"                                                                                                             |     |
| #33 | "fluid therapy"                                                                                                                |     |
| #32 | "fluid therapy"[MeSH]                                                                                                          |     |
| #31 | ((#13 OR #14 OR #15 OR #16 OR #17 OR #18 OR #19 OR #20 OR #21 OR #22 OR #23 OR #24 OR #25 OR #26 OR #27 OR #28 OR #29 OR #30)) |     |
| #30 | outcome                                                                                                                        |     |
| #29 | "urinary output"                                                                                                               |     |
| #28 | "urine production"                                                                                                             |     |
| #27 | "urine output"                                                                                                                 |     |
| #26 | "diuresis"                                                                                                                     |     |
| #25 | "mortality rate"                                                                                                               |     |
| #24 | "loss of life"                                                                                                                 |     |
| #23 | decease                                                                                                                        |     |
| #22 | lethality                                                                                                                      |     |
| #21 | fatality                                                                                                                       |     |
| #20 | survival                                                                                                                       |     |
| #19 | death                                                                                                                          |     |
| #18 | mortality                                                                                                                      |     |
| #17 | "mortality"[MeSH]                                                                                                              |     |
| #16 | "acute kidney injury"                                                                                                          |     |
| #15 | "complications"                                                                                                                |     |
| #14 | "organ dysfunction"                                                                                                            |     |
| #13 | "organ failure"                                                                                                                |     |
| #12 | (#1 OR #2 OR #3 # OR #4 OR #5 OR #6 OR #7 OR #8 OR #9 OR #10 OR #11)                                                           |     |
| #11 | "supranormal"                                                                                                                  |     |
| #10 | "goal directed therapy"                                                                                                        |     |
| #9  | "goal-directed therapy"                                                                                                        |     |
| #8  | optimisation                                                                                                                   |     |
| #7  | optimization                                                                                                                   |     |
| #6  | "cardiac index"                                                                                                                |     |
| #5  | "stroke volume"                                                                                                                |     |
| #4  | "cardiac output"                                                                                                               |     |

|    |                      |  |
|----|----------------------|--|
| #3 | "hemodynamic target" |  |
| #2 | "goal-directed"      |  |
| #1 | "goal directed"      |  |

**Table S2** Search strategy in EMBASE database

|     |                                                                                                                         |     |
|-----|-------------------------------------------------------------------------------------------------------------------------|-----|
| #47 | #39 AND #46                                                                                                             | 890 |
| #46 | #42 OR #45                                                                                                              |     |
| #45 | #43 OR #44                                                                                                              |     |
| #44 | "controlled trial"                                                                                                      |     |
| #43 | trial                                                                                                                   |     |
| #42 | #40 OR #41                                                                                                              |     |
| #41 | "randomised"                                                                                                            |     |
| #40 | "randomized"                                                                                                            |     |
| #39 | #30 AND #38                                                                                                             |     |
| #38 | #12 AND #37                                                                                                             |     |
| #37 | ((#31 OR #32 OR #33 OR #34 OR #35 OR #36))                                                                              |     |
| #36 | fluid                                                                                                                   |     |
| #35 | "fluid resuscitation"                                                                                                   |     |
| #34 | "fluid loading"                                                                                                         |     |
| #33 | "fluid administration"                                                                                                  |     |
| #32 | "fluid management"                                                                                                      |     |
| #31 | "fluid therapy"                                                                                                         |     |
| #30 | ((#13 OR #14 OR #15 OR #16 OR #17 OR #18 OR #19 OR #20 OR #21 OR #22 OR #23 OR #24 OR #25 OR #26 OR #27 OR #28 OR #29)) |     |
| #29 | outcome                                                                                                                 |     |
| #28 | "urinary output"                                                                                                        |     |
| #27 | "urine production"                                                                                                      |     |
| #26 | "urine output"                                                                                                          |     |
| #25 | "diuresis"                                                                                                              |     |
| #24 | "mortality rate"                                                                                                        |     |
| #23 | "loss of life"                                                                                                          |     |
| #22 | decease                                                                                                                 |     |
| #21 | lethality                                                                                                               |     |
| #20 | fatality                                                                                                                |     |
| #19 | survival                                                                                                                |     |
| #18 | death                                                                                                                   |     |
| #17 | mortality                                                                                                               |     |
| #16 | "acute kidney injury"                                                                                                   |     |
| #15 | "complications"                                                                                                         |     |
| #14 | "organ dysfunction"                                                                                                     |     |
| #13 | "organ failure"                                                                                                         |     |
| #12 | (#1 OR #2 OR #3 OR #4 OR #5 OR #6 OR #7 OR #8 OR #9 OR #10 OR #11)                                                      |     |
| #11 | "supranormal"                                                                                                           |     |
| #10 | 'goal-directed'                                                                                                         |     |
| #9  | 'goal directed'                                                                                                         |     |
| #8  | optimisation                                                                                                            |     |
| #7  | optimization                                                                                                            |     |
| #6  | "cardiac index"                                                                                                         |     |
| #5  | "stroke volume"                                                                                                         |     |
| #4  | "cardiac output"                                                                                                        |     |
| #3  | "hemodynamic target"                                                                                                    |     |
| #2  | 'goal-directed therapy'                                                                                                 |     |

|    |                         |  |
|----|-------------------------|--|
| #1 | 'goal directed therapy' |  |
|----|-------------------------|--|

**Supplemental Digital Content Table S3** Amount of fluids infused during the relevant study period.

| <b>Study</b>                                         | <b>Total fluid amount<br/>GDT (mL)</b> | <b>Total fluid amount<br/>CFM (mL)</b> |
|------------------------------------------------------|----------------------------------------|----------------------------------------|
| <b>Not targeting urine output in either protocol</b> |                                        |                                        |
| Sinclair 1997                                        | 1475                                   | 1000                                   |
| Polonen 2000                                         | 3193                                   | 2772                                   |
| Rhodes 2002                                          | 4953                                   | 4295                                   |
| Pearse 2005                                          | 2962                                   | 2164                                   |
| Szakmany 2005                                        | 5458                                   | 5298                                   |
| Wakeling 2005                                        | 5000                                   | 4500                                   |
| Forget 2010                                          | 5777                                   | 6835                                   |
| WenKui 2010                                          | 2800                                   | 2800                                   |
| Cecconi 2011                                         | 6229                                   | 3293                                   |
| Challand 2012                                        | 5309                                   | 4010                                   |
| Bartha 2013                                          | 1310                                   | 1197                                   |
| Bisgaard 2013                                        | 7236                                   | 8953                                   |
| Lai 2015                                             | 5369                                   | 4532                                   |
| <b>Targeting urine output only in CFM</b>            |                                        |                                        |
| Bishop 1995                                          | 5496                                   | 6165                                   |
| McKendry 2004                                        | 2020                                   | 1370                                   |
| Benes 2010                                           | 3746                                   | 3729                                   |
| Mayer 2010                                           | 4528                                   | 4494                                   |
| McKenny 2013                                         | 2000                                   | 2500                                   |
| Zakhaleva 2013                                       | 5300                                   | 5600                                   |
| Osawa 2016                                           | 1056                                   | 894                                    |
| <b>Targeting urine output in both protocols</b>      |                                        |                                        |
| Shoemaker 1988                                       | -                                      | -                                      |
| Boyd 1993                                            | 5075                                   | 4845                                   |
| Gattinoni 1995                                       | -                                      | -                                      |
| Lobo 2000                                            | 7200                                   | 6600                                   |
| Rivers 2001                                          | 4981                                   | 3499                                   |
| Chytra 2007                                          | 4516                                   | 3599                                   |
| Donati 2007                                          | 4391                                   | 4285                                   |
| Kapoor 2008                                          | -                                      | -                                      |
| Senagore 2009                                        | 3400                                   | 3000                                   |
| Jammer 2010                                          | 3875                                   | 6490                                   |
| Jansen 2010                                          | 3019                                   | 2390                                   |
| Jhanji 2010                                          | 1879                                   | 1743                                   |
| Bisgaard 2013                                        | 4314                                   | 3616                                   |
| Zheng 2013                                           | 2650                                   | 3950                                   |
| Peng 2014                                            | 2100                                   | 2600                                   |
| Correa-Gallego 2015                                  | 2000                                   | 2900                                   |

Pre: preoperative; intra: intraoperative; post: postoperative; ICU: intensive care unit.

**Supplemental Digital Content Table S4** Available urine output data from the selected studies

| Study                             | Intraoperative urine output    |                                | P       | Postoperative urine output |                                                        | P      |
|-----------------------------------|--------------------------------|--------------------------------|---------|----------------------------|--------------------------------------------------------|--------|
|                                   | GDT                            | CFM                            |         | GDT                        | CFM                                                    |        |
| <b>Not targeting urine output</b> |                                |                                |         |                            |                                                        |        |
| Szakmany 2005                     | 757 mL ± 533                   | 755 mL ± 528                   | NS      |                            |                                                        |        |
| Cecconi 2011                      | 1225 mL (IQR 650 - 1375)       | 300 mL (IQR 100 - 475)         | <0.0001 |                            |                                                        |        |
| Challand 2012                     | 655 mL ± 302                   | 388 mL ± 355                   | <0.001  |                            |                                                        |        |
| Bartha 2013                       | 400 mL (range 0 - 1900)        | 300 mL (range 0 - 1300)        | NS      | 400 mL (range 0 - 2275)    | 350 mL (range 25 - 4800)                               | NS     |
| <b>Targeting urine output</b>     |                                |                                |         |                            |                                                        |        |
| Gattinoni 1995                    |                                |                                |         | 95.8 mL ± 50.1             | CIG: 102 mL ± 49.5<br>O <sub>2</sub> G: 95.5 mL ± 49.5 | 0.274  |
| Kapoor 2008                       |                                |                                |         | 230* mL                    | 140* mL                                                | NS     |
| Jammer 2010                       | 1.1 ml/kg/h ± 1.5              | 1.5 ml/kg/h ± 1.5              | 0.020   | 83 mL ± 445                | 1104 mL ± 449                                          | <0.001 |
| Zheng 2013                        | 618 mL ± 239                   | 800 mL ± 304                   | <0.001  | 518 mL ± 330               | 870 mL ± 304                                           | <0.001 |
| Peng 2014                         | 1.98 ml/kg/h (IQR 1.29 - 2.63) | 2.20 ml/kg/h (IQR 1.53 - 3.25) | NS      |                            |                                                        |        |
| Correa-Gallego 2015               | 200 mL ± 100                   | 300 mL ± 200                   | 0.10    | 900 mL ± 600               | 1000 mL ± 500                                          | 0.07   |

Data as reported by the respective studies as either mean ± standard deviation or median (interquartile range (IQR) or range), in mL or mL/kg/h. \*: approximated from figure. GDT: goal-directed therapy; CFM: conventional fluid management; CIG: cardiac index guided group; O<sub>2</sub>G: oxygen saturation guided group. NS: not statistically significant.

**Supplemental Digital Content Table S5** Characteristics of observational studies included

| <b>Study</b>                                         | <b>Total number</b> | <b>Type of patient</b> | <b>Timing</b> | <b>Mortality (GDT vs CFM), follow up</b> |
|------------------------------------------------------|---------------------|------------------------|---------------|------------------------------------------|
| <b>Not targeting urine output in either protocol</b> |                     |                        |               |                                          |
| Hussien 2011                                         | 25                  | Abdominal              | intra         | 1 vs 0, 10 days                          |
| See 2014                                             | 612                 | Critically ill         | ICU           | 90 vs 148, 30 days                       |
| Thomson 2014                                         | 264                 | Cardiac                | Post          | 0 vs 2, 30 days                          |
| Cannesson 2015                                       | 330                 | Abdominal,<br>pelvic   | intra         | 2 vs 1, 30 days                          |
| <b>Targeting urine output in both protocols</b>      |                     |                        |               |                                          |
| Sivayoham 2012                                       | 174                 | Critically ill         | ICU           | 22 vs 33, 30 days                        |
| Reydellet 2013                                       | 50                  | Abdominal              | Intra, post   | 1 vs 4, 30 days                          |

Pre: preoperative; intra: intraoperative; post: postoperative; ICU: intensive care unit.

**Supplemental Digital Content Table S6** Hemodynamic monitoring used in observational studies

| <b>Study</b>                                         | <b>Device</b>       | <b>Hemodynamic targets</b>                 | <b>Urine output threshold</b> | <b>Intervention</b>                              |
|------------------------------------------------------|---------------------|--------------------------------------------|-------------------------------|--------------------------------------------------|
| <b>Not targeting urine output in either protocol</b> |                     |                                            |                               |                                                  |
| Hussien 2011<br>See 2014                             | Oesophageal Doppler | SV<br>PP, SV                               |                               | colloids<br>crystalloids                         |
| Thomson 2014                                         | LiDCOplus           | SV                                         |                               | colloids, crystalloids,<br>blood products        |
| Cannesson 2015                                       | EV 1000, Edwards    | SV, SVV, CI                                |                               | crystalloids                                     |
| <b>Targeting urine output in both protocols</b>      |                     |                                            |                               |                                                  |
| Sivayoham 2012                                       |                     | SVO <sub>2</sub> , CI,                     | 0.5 ml/kg/h                   | crystalloids, colloids,<br>vasoactive medication |
| Reydellet 2013                                       | FloTrac-Vigileo     | MAP, CO, CI, SV,<br>SVV, ScvO <sub>2</sub> | no specific goal<br>mentioned | colloids, crystalloids<br>vasoactive medication  |

SV: stroke volume; PP: pulse pressure; SVV: stroke volume variation; CI: cardiac index; SvO<sub>2</sub>: mixed venous oxygen saturation; MAP: mean arterial pressure; CO: cardiac output; ScvO<sub>2</sub>: central venous oxygen saturation;
