# Supplementary material for: Targeting urine output and 30-day mortality in goal-directed therapy: a systematic review with meta-analysis and meta-regression
Source: PubMed Central journal article supplement (PMC5303289; doi:10.1186/s12871-017-0316-4), 2017-02-10

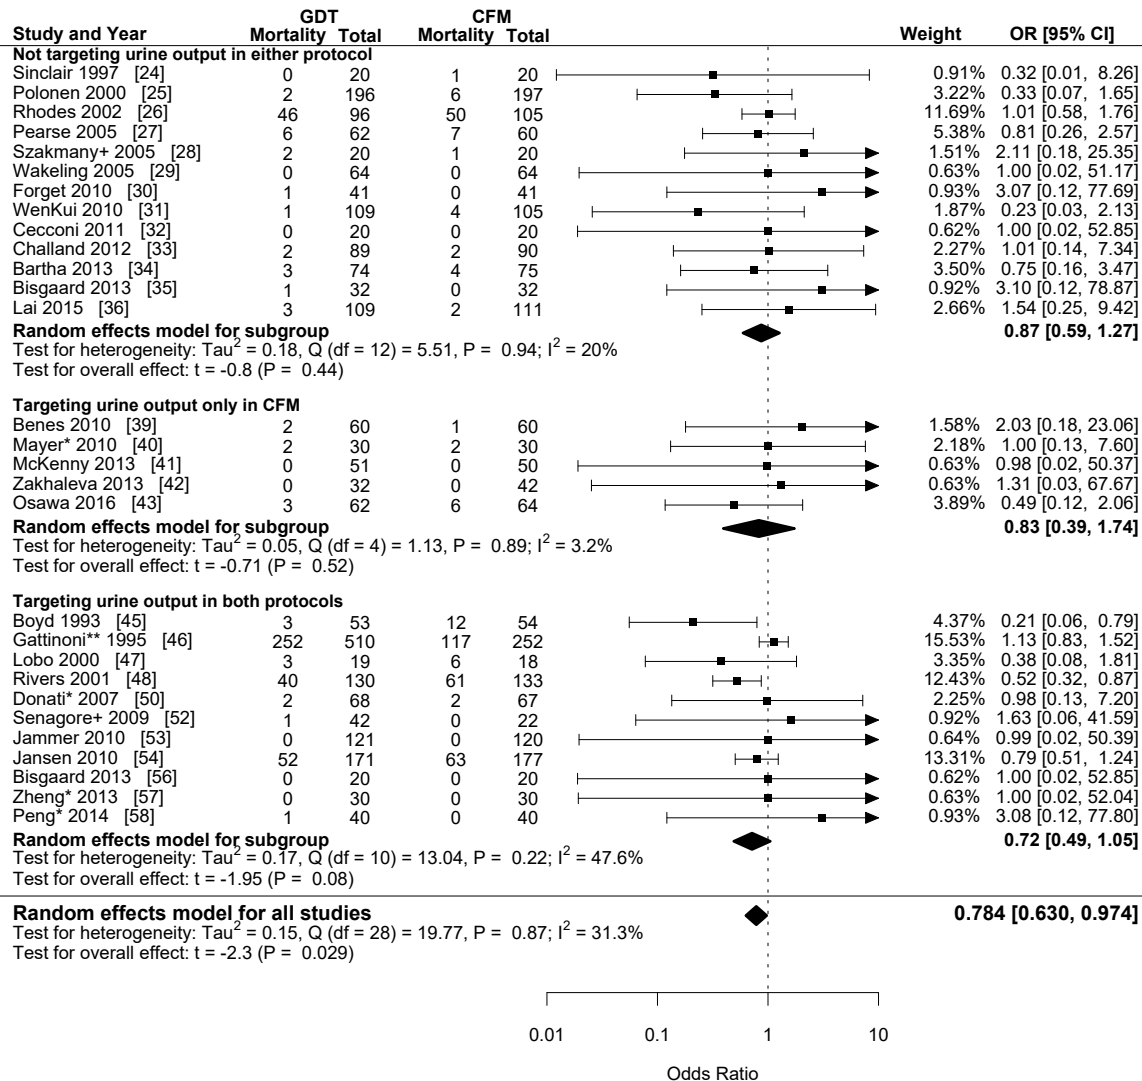

Supplement: 12871_2017_316_MOESM4_ESM.pdf [file 12871_2017_316_MOESM4_ESM.pdf]
