# Supplementary material for: Targeting urine output and 30-day mortality in goal-directed therapy: a systematic review with meta-analysis and meta-regression
Source: Springer Nature journal article supplement (doi:10.1186/s12871-017-0316-4), 2017-02-10

**Fig S1: Funnel plot**

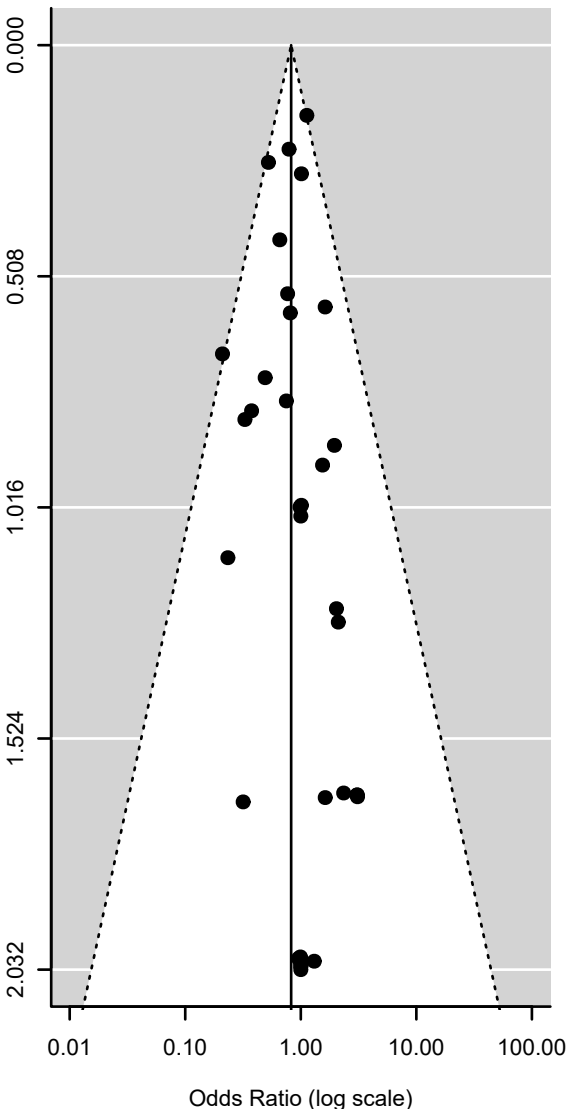

**Trim and fill method**

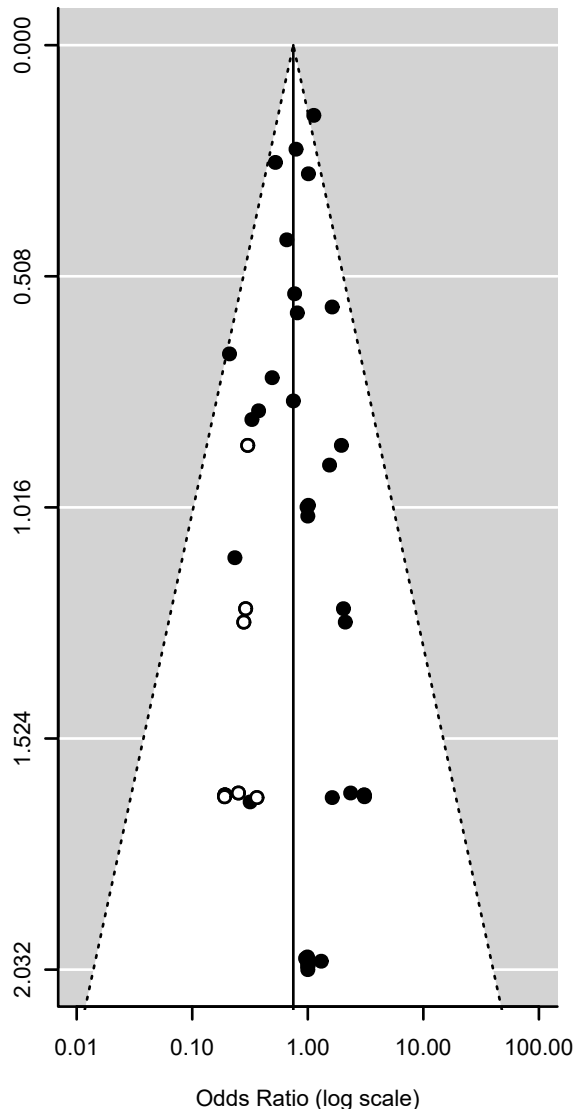

Supplement: MOESM2 [file 12058794]
